# Supplementary material for: A Comparison of Patient-Reported Outcome Measures of Quality of Life By Dialysis Modality in the Treatment of Kidney Failure: A Systematic Review
Source: PubMed Central journal article supplement — Can J Kidney Health Dis. 2020 Oct 19;7:2054358120957431. doi: 10.1177/2054358120957431 (PMC7580133; doi:10.1177/2054358120957431), 2020-10-19
Supplement: CADTH_Supplementary_Tables.pdf [file CADTH_Supplementary_Tables.pdf]

## Supplementary Tables:

Table 1: Mean quality of life scores for the change in quality of life scores comparing in-centre hemodialysis to peritoneal dialysis from initial 2017 CADTH report (Short-Form-36)

Table 2: Mean quality of life scores for the change in quality of life scores comparing in-centre hemodialysis to peritoneal dialysis from updated literature search (Short-Form-36)

Table 3: Quality of life scores categorized as the proportion of patients reporting the same, better or worse presented for the change in quality of life scores comparing in-centre hemodialysis to peritoneal dialysis (Short-Form-36)

Table 4: Mean quality of life scores for the change in quality of life scores comparing in-centre hemodialysis to peritoneal dialysis (Kidney Disease Quality of Life KDQOL)

Table 5: Quality of life scores categorized as the proportion of patients reporting the same, better or worse presented for the change in quality of life scores comparing in-centre hemodialysis to peritoneal dialysis (KDQOL)

Table 6: Mean quality of life scores for the change in quality of life scores comparing in-centre hemodialysis to peritoneal dialysis (EuroQOL)

Table 7: Mean quality of life scores for the change in quality of life scores comparing in-centre hemodialysis to peritoneal dialysis (CHOICE health experience questionnaire)

Table 8: Mean differences between peritoneal dialysis and in-centre hemodialysis (PD-ICHHD) over time via mixed model analysis using multiple QOL scores

Table 9: Mean quality of life scores for the change in quality of life scores comparing in-centre hemodialysis to home hemodialysis (Short-Form-36)

Table 10: Mean quality of life scores for the change in quality of life scores comparing in-centre hemodialysis to home hemodialysis (Kidney Disease Quality of Life KDQOL)

Table 11: Mean quality of life scores for the change in quality of life scores comparing conventional home hemodialysis to frequent nocturnal hemodialysis (RAND-36, Beck Depression Inventory, Study Sleep Problems Index)

Table 1: Mean quality of life scores for the change in quality of life scores comparing in-centre hemodialysis to peritoneal dialysis from initial CADTH report (Short-Form-36)

| First author, year |                   | Manns, 2003          |                |                  | Frimat,2006    |           |            | Harris,2002    |           |            |                                                                                                    | Wu, 2004       |            |                                                  |
|--------------------|-------------------|----------------------|----------------|------------------|----------------|-----------|------------|----------------|-----------|------------|----------------------------------------------------------------------------------------------------|----------------|------------|--------------------------------------------------|
|                    |                   | Domain scores        |                |                  |                |           |            |                |           |            |                                                                                                    |                |            |                                                  |
| Domain             | Dialysis modality | Base-line mean (±SE) | 6mo mean (±SE) | 12 mo mean (±SE) | Base-line mean | 6mo: mean | 12 mo mean | Base-line mean | 6 mo mean | 12 mo mean | Calculated mean differences (95% CI) for PD-ICHD *                                                 | Base-line mean | 12 mo mean | Adjusted ORs (95% CI) for PD vs ICHD at 12 mo ** |
| MCS                | ICHD              |                      |                |                  |                |           |            | 49.9           | 53.1      | 52.6       | <i>Baseline:</i> 2.9 (-0.4,6.2);<br><i>6 mo:</i> -1.5 (-4.1,1.1);<br><i>12 mo:</i> -0.9 (-4.5,2.7) | 46.8           | 48.2       | 0.95<br>(0.62,1.45)                              |
|                    | PD                |                      |                |                  |                |           |            | 52.5           | 54.6      | 54.6       |                                                                                                    | 48             | 49.4       |                                                  |
| PCS                | ICHD              |                      |                |                  |                |           |            | 32.7           | 30.1      | 31.6       | <i>Baseline:</i> 1.2 (-2.0,4.3)<br><i>6 mo:</i> 2.9 (-0.04,5.9)<br><i>12 mo:</i> -0.5 (-4.1,1.7)   | 32.5           | 33.2       | 0.79<br>(0.52,1.20)                              |
|                    | PD                |                      |                |                  |                |           |            | 34.7           | 35.5      | 32         |                                                                                                    | 33.5           | 32.5       |                                                  |
| RSC                | ICHD              |                      |                |                  |                |           |            |                |           |            |                                                                                                    |                |            |                                                  |
|                    | PD                |                      |                |                  |                |           |            |                |           |            |                                                                                                    |                |            |                                                  |
| PF                 | ICHD              | 48.0 (2.7)           | 47.3 (2.9)     | 47.6 (3.0)       | 40             | 42.9      | 43.3       |                |           |            |                                                                                                    | 45.3           | 45.7       | 0.72<br>(0.45,1.15)                              |
|                    | PD                | 47.5 (6.1)           | 45 (6.0)       | 43.8 (5.9)       | 42             | 48.5      | 35.1       |                |           |            |                                                                                                    | 49.6           | 45.1       |                                                  |
| RP                 | ICHD              | 25.9 (3.4)           | 33.2 (3.8)     | 31.6 (3.7)       | 12.2           | 24.3      | 21.4       |                |           |            |                                                                                                    | 23.7           | 28.5       | 0.84<br>(0.54,1.31)                              |
|                    | PD                | 34.4 (9.5)           | 25 (7.4)       | 27.2 (7.4)       | 13.9           | 36.7      | 35.1       |                |           |            |                                                                                                    | 25.3           | 26.5       |                                                  |
| BP                 | ICHD              | 62.6 (2.7)           | 57.9 (2.9)     | 57.5 (2.7)       | 43             | 49.7      | 46.1       |                |           |            |                                                                                                    | 56             | 57.2       | 1.12<br>(0.74,1.71)                              |
|                    | PD                | 66.0 (6.1)           | 64.7 (5.9)     | 66.3 (5.6)       | 44.5           | 59.2      | 55.2       |                |           |            |                                                                                                    | 62.5           | 62.6       |                                                  |
| GH                 | ICHD              | 43.0 (2.0)           | 42 (2.1)       | 41.8 (2.0)       | 38.1           | 40.5      | 44.1       |                |           |            |                                                                                                    | 41.5           | 44.3       | 0.65<br>(0.41,1.04)                              |
|                    | PD                | 43.3 (4.1)           | 43.3 (4.1)     | 40.4 (4.0)       | 39.6           | 46.8      | 44.9       |                |           |            |                                                                                                    | 42.2           | 41.2       |                                                  |
| V                  | ICHD              | 43.3 (2.2)           | 43.9 (2.2)     | 42.4 (2.1)       | 30.1           | 35.4      | 35.3       |                |           |            |                                                                                                    | 42.2           | 44.3       | 0.90<br>(0.59,1.38)                              |
|                    | PD                | 41.7 (3.6)           | 41.3 (4.1)     | 41 (3.7)         | 30.8           | 42.1      | 37.7       |                |           |            |                                                                                                    | 40.7           | 39.9       |                                                  |
| RE                 | ICHD              | 56.5 (4.2)           | 58.6 (4.1)     | 56.3 (4.3)       | 55.7           | 62.4      | 60.5       |                |           |            |                                                                                                    | 60.3           | 64.2       | 0.88<br>(0.56,1.38)                              |
|                    | PD                | 63.9 (8.7)           | 51.4 (10.0)    | 44.4 (9.3)       | 53.4           | 63        | 62.9       |                |           |            |                                                                                                    | 62.9           | 64.1       |                                                  |
| SF                 | ICHD              | 60.6 (2.4)           | 59.9 (2.8)     | 58 (2.9)         | 18.9           | 26.3      | 27.4       |                |           |            |                                                                                                    | 52.3           | 57.4       | 0.88<br>(0.58,1.36)                              |
|                    | PD                | 68.2 (5.3)           | 60.9 (5.2)     | 65.1 (4.0)       | 17.3           | 44.6      | 48.3       |                |           |            |                                                                                                    | 60.9           | 63.1       |                                                  |
| MH                 | ICHD              | 72.6 (1.7)           | 69.3 (2.0)     | 69.4 (1.9)       | 47.7           | 55.7      | 52.1       |                |           |            |                                                                                                    | 69.1           | 69.7       | 1.19<br>(0.76,1.89)                              |
|                    | PD                | 70.5 (4.0)           | 69.7 (5.0)     | 71.7 (3.5)       | 47.3           | 58        | 58.3       |                |           |            |                                                                                                    | 71.8           | 73.1       |                                                  |

CI=confidence intervals; ICHD = in-centre hemodialysis; mo = months; OR = odds ratio; PD = peritoneal dialysis; SE = standard error; vs = versus \*Harris mean differences adjusted for study cohort, time on dialysis, age, sex, social class, and comorbidity \*\*Wu ORs adjusted for baseline domain score, age, gender, race, education, albumin, creatinine, and hematocrit; Data is presented as it was reported in the published studies (some studies did not report SDs or SEs, and only presented means). Empty cells indicate data not reported in the published studies.

**SF-36 domains** MCS = mental component score PCS = physical health component score RCS = Role of social component score V = vitality (energy/fatigue) SF = social function (social functioning) RE = role emotional (limitation in role functioning due to mental health) ME = mental health (psychological well-being) PCS = physical health component score PF = physical function (limitations in performing physical activities) RP = role physical (limitations in role functioning due to physical health) BP = bodily pain (somatic pain) GH = general health (general perceptions about health)

Table 2: Mean quality of life scores for the change in quality of life scores comparing in-centre hemodialysis to peritoneal dialysis from updated literature search (Short-Form-36)

| First author, year |                   | Hiramatsu, 2019           |                        |                        | Jung, 2019            |                        |                        | Iyasere, 2019                                                                                                            |
|--------------------|-------------------|---------------------------|------------------------|------------------------|-----------------------|------------------------|------------------------|--------------------------------------------------------------------------------------------------------------------------|
| Domain scores      |                   |                           |                        |                        |                       |                        |                        |                                                                                                                          |
| Domain             | Dialysis modality | Baseline: mean( $\pm$ SE) | 12 mo: mean( $\pm$ SE) | 24 mo: mean( $\pm$ SE) | 3 mo: mean( $\pm$ SD) | 12 mo: mean( $\pm$ SD) | 24 mo: mean( $\pm$ SD) | Estimated mean differences for PD-ICHD at various time points (3, 6, 9, 12, 15, 18, and 21 months) compared to 24 months |
| MCS                | ICHD              | 51.9 (5.5)                | 52.2 (8.3)             | 51.6 (7.6)             | 52.1 (19.8)           | 55.5 (19.5)            | 53.7 (19.7)            | Not significant differences from any time point to 24 months                                                             |
|                    | PD                | 50.1 (8.8)                | 49.4 (7.2)             | 51.8 (7.7)             | 54.0 (20.2)           | 56.3 (19.3)            | 52.9 (21.1)            |                                                                                                                          |
| PCS                | ICHD              | 39.4 (8.8)                | 38.0 (10.4)            | 36.3 (10.1)            | 55.4 (21.3)           | 60.5 (22.6)            | 59.3 (21.0)            | Not significant differences from any time point to 24 months                                                             |
|                    | PD                | 39.4 (10.8)               | 45.9 (11.9)            | 42.8 (11.3)            | 59.1 (21.7)           | 60.6 (22.8)            | 59.7 (22.3)            |                                                                                                                          |
| RSC                | ICHD              | 43.9 (13.3)               | 38.3 (12.5)            | 36.8 (12.8)            |                       |                        |                        |                                                                                                                          |
|                    | PD                | 37.3 (13.6)               | 46.8 (10.7)            | 46.4 (8.9)             |                       |                        |                        |                                                                                                                          |
| PF                 | ICHD              |                           |                        |                        | 68.3 (26.0)           | 71.7 (26.5)            | 71.1 (23.6)            |                                                                                                                          |
|                    | PD                |                           |                        |                        | 71.6 (26.0)           | 72.7 (26.6)            | 73.5 (25.5)            |                                                                                                                          |
| RP                 | ICHD              |                           |                        |                        | 40.4 (41.2)           | 55.2 (42.8)            | 50.7 (43.1)            |                                                                                                                          |
|                    | PD                |                           |                        |                        | 46.5 (42.7)           | 51.6 (44.5)            | 52.5 (42.0)            |                                                                                                                          |
| BP                 | ICHD              |                           |                        |                        | 69.3 (24.7)           | 72.4 (23.4)            | 72.4 (23.8)            |                                                                                                                          |
|                    | PD                |                           |                        |                        | 73.7 (23.2)           | 72.1 (23.7)            | 73.3 (23.9)            |                                                                                                                          |
| GH                 | ICHD              |                           |                        |                        | 35.9 (18.3)           | 37.7 (20.2)            | 37.3 (20.5)            |                                                                                                                          |
|                    | PD                |                           |                        |                        | 38.3 (19.7)           | 38.8 (19.6)            | 32.7 (18.4)            |                                                                                                                          |
| V                  | ICHD              |                           |                        |                        | 43.2 (18.8)           | 45.3 (17.5)            | 43.6 (17.1)            |                                                                                                                          |
|                    | PD                |                           |                        |                        | 44.9 (19.1)           | 44.7 (17.2)            | 41.3 (18.0)            |                                                                                                                          |
| RE                 | ICHD              |                           |                        |                        | 55.4 (44.9)           | 62.6 (44.4)            | 62.4 (43.9)            |                                                                                                                          |
|                    | PD                |                           |                        |                        | 55.4 (45.7)           | 63.7 (44.0)            | 60.4 (45.3)            |                                                                                                                          |
| SF                 | ICHD              |                           |                        |                        | 64.0 (25.6)           | 67.5 (25.3)            | 64.4 (25.9)            |                                                                                                                          |
|                    | PD                |                           |                        |                        | 65.4 (26.1)           | 70.1 (25.0)            | 66.2 (25.3)            |                                                                                                                          |
| MH                 | ICHD              |                           |                        |                        | 52.6 (17.1)           | 54.7 (16.8)            | 52.3 (17.0)            |                                                                                                                          |
|                    | PD                |                           |                        |                        | 56.0 (17.4)           | 55.5 (15.6)            | 52.4 (17.3)            |                                                                                                                          |

ICHD = in-centre hemodialysis; mo = months; PD = peritoneal dialysis; SE = standard error; SD = standard deviation; vs = versus; Data is presented as it was reported in the published studies (some studies did not report SDs or SEs, and only presented means).

Empty cells indicate data not reported in the published studies.

**SF-36 domains** MCS = mental component score PCS = physical health component score RCS = Role of social component score V = vitality (energy/fatigue) SF = social function (social functioning) RE = role emotional (limitation in role functioning due to mental health) ME = mental health (psychological well-being) PCS = physical health component score PF = physical function (limitations in performing physical activities) RP = role physical (limitations in role functioning due to physical health) BP = bodily pain (somatic pain) GH = general health (general perceptions about health)

Table 3: Quality of life scores categorized as the proportion of patients reporting the same, better or worse presented for the change in quality of life scores comparing in-centre hemodialysis to peritoneal dialysis (Short-Form-36)

| First author, year                                                         | De Abreu, 2011*                                   |          |            | Wu, 2004** |          |            |           |
|----------------------------------------------------------------------------|---------------------------------------------------|----------|------------|------------|----------|------------|-----------|
|                                                                            | Change in domain score from baseline to 12 months |          |            |            |          |            |           |
| Domain                                                                     | Dialysis modality                                 | Same (%) | Better (%) | Worse (%)  | Same (%) | Better (%) | Worse (%) |
| MCS (mental health component score)                                        | ICHD                                              | 54.5     | 22.8       | 22.8       | 48       | 25         | 27        |
|                                                                            | PD                                                | 47.8     | 26.1       | 26.1       | 49       | 27         | 24        |
| PCS (physical health component score)                                      | ICHD                                              | 40.2     | 24.3       | 35.5       | 42       | 27         | 31        |
|                                                                            | PD                                                | 36       | 23.6       | 40.4       | 43       | 25         | 32        |
| PF (physical function -limitations in performing physical activities)      | ICHD                                              |          |            |            | 51       | 22         | 27        |
|                                                                            | PD                                                |          |            |            | 54       | 18         | 28        |
| RP (role physical -limitations in role functioning due to physical health) | ICHD                                              |          |            |            | 58       | 21         | 21        |
|                                                                            | PD                                                |          |            |            | 56       | 21         | 23        |
| BP (bodily pain -somatic pain)                                             | ICHD                                              |          |            |            | 46       | 25         | 28        |
|                                                                            | PD                                                |          |            |            | 47       | 27         | 26        |
| GH (general health - general perceptions about health)                     | ICHD                                              |          |            |            | 59       | 20         | 21        |
|                                                                            | PD                                                |          |            |            | 63       | 16         | 21        |
| V (vitality -energy/fatigue)                                               | ICHD                                              |          |            |            | 49       | 24         | 27        |
|                                                                            | PD                                                |          |            |            | 46       | 25         | 29        |
| RE role emotional -limitation in role functioning due to mental health)    | ICHD                                              |          |            |            | 59       | 21         | 20        |
|                                                                            | PD                                                |          |            |            | 57       | 21         | 22        |
| SF (social functioning)                                                    | ICHD                                              |          |            |            | 41       | 28         | 30        |
|                                                                            | PD                                                |          |            |            | 43       | 27         | 30        |
| MH (mental health -psychological well-being)                               | ICHD                                              |          |            |            | 57       | 19         | 24        |
|                                                                            | PD                                                |          |            |            | 57       | 22         | 21        |

ICHD = in-centre hemodialysis; PD = peritoneal dialysis; \*Clinically significant changes in quality of life for the individual domains were defined as a difference of +5 points. Clinically significant changes for the PCS and MCS are defined as +/- 5.7 points and +/-6.3 points, respectively; \*\*Defined significant 1-yr increases and decreases in dialysis-specific and SF-36 domains as changes in domain scores exceeding two standard errors of measurement (SEM); Empty cells indicate data not reported in the published studies.

Table 4: Mean quality of life scores for the change in quality of life scores comparing in-centre hemodialysis to peritoneal dialysis (Kidney Disease Quality of Life KDQOL)

| First author, year |                   | Manns, 2003         |                    |                     | Frimat, 2006  |              |               | Harris, 2002  |              |               | Neumann, 2017                                                                  |                     | Jung, 2019          |                    |                     |                     |
|--------------------|-------------------|---------------------|--------------------|---------------------|---------------|--------------|---------------|---------------|--------------|---------------|--------------------------------------------------------------------------------|---------------------|---------------------|--------------------|---------------------|---------------------|
| Domain             | Dialysis modality | Domain scores       |                    |                     |               |              |               |               |              |               |                                                                                |                     |                     |                    |                     |                     |
|                    |                   | Baseline mean (±SE) | 6 month mean (±SE) | 12 month mean (±SE) | Baseline mean | 6 month mean | 12 month mean | Baseline mean | 6 month mean | 12 month mean | Calculated mean differences (95% CI) for PD-ICHD                               | Baseline mean (±SD) | 12 month mean (±SD) | 3 month mean (±SE) | 12 month Mean (±SE) | 24 month mean (±SE) |
| SP                 | ICHD              | 72.8 (1.6)          | 73.1 (1.5)         | 73.1 (1.5)          | 65.7          | 68.8         | 66.9          | 81.6          | 79.7         | 80            | Baseline: 3.5 (0.3, 6.6);<br>6 mo: 2.4 (-0.5, 5.3);<br>12 mo: -1.2 (-4.1, 1.7) |                     |                     | 79.7 (15.6)        | 81.4 (15.0)         | 79.6 (15.6)         |
|                    | PD                | 73.7 (3.1)          | 73.6 (3.3)         | 73.5 (3.2)          | 68            | 74.8         | 75            | 85.4          | 85.2         | 82            |                                                                                |                     |                     | 82.0 (14.8)        | 82.6 (12.9)         | 80.8 (14.8)         |
| EK                 | ICHD              | 59.0 (2.0)          | 60.4 (2.2)         | 59.4 (2.0)          | 61            | 57.2         | 55.9          |               |              |               |                                                                                |                     |                     | 68.5 (18.2)        | 70.4 (18.6)         | 69.8 (17.8)         |
|                    | PD                | 68.5 (4.3)          | 67.7 (3.3)         | 66.7 (2.9)          | 58.5          | 66.3         | 64            |               |              |               |                                                                                |                     |                     | 73.6 (17.5)        | 75.4 (16.2)         | 72.8 (18)           |
| BK                 | ICHD              | 36.9 (2.3)          | 38.3 (2.5)         | 40.3 (2.4)          | 42.5          | 39.5         | 38.8          |               |              |               |                                                                                |                     |                     | 31.5 (21.6)        | 32.1 (23.9)         | 30.5 (22.8)         |
|                    | PD                | 48.7 (5.4)          | 52.6 (5.5)         | 51.8 (5.2)          | 40.2          | 53.9         | 51            |               |              |               |                                                                                |                     |                     | 38.0 (24.2)        | 38.4 (23.5)         | 31.9 (22.4)         |
| WS                 | ICHD              | 31.0 (3.3)          | 26.2 (3.1)         | 29.2 (3.3)          | 14.5          | 9.5          | 11            |               |              |               |                                                                                |                     |                     | 25.3 (32.8)        | 25.1 (33.6)         | 23.7 (31.6)         |
|                    | PD                | 35.4 (8.2)          | 33.3 (8.3)         | 29.2 (7.9)          | 17            | 21.3         | 17.3          |               |              |               |                                                                                |                     |                     | 37.1 (37.4)        | 36.9 (38.5)         | 32.1 (37.9)         |
| CF                 | ICHD              | 79.2 (1.6)          | 78.1 (1.7)         | 78.3 (1.7)          | 63.5          | 66.5         | 65.8          |               |              |               |                                                                                | 87.8 (13.6)         | 86.0 (14.1)         | 83.6 (19.0)        | 84.6 (18.4)         | 82.7 (19.5)         |
|                    | PD                | 76.7 (4.2)          | 77.8 (4.0)         | 81.1 (3.2)          | 63.4          | 71.7         | 71.7          |               |              |               |                                                                                | 86.7 (13.5)         | 84.4 (15.3)         | 85.9 (16.3)        | 87.1 (17.0)         | 84.2 (16.8)         |
| QS                 | ICHD              | 77.2 (1.8)          | 77.4 (1.5)         | 77.7 (1.5)          | 79.1          | 77.3         | 78.4          |               |              |               |                                                                                |                     |                     | 65.5 (20.4)        | 66.4 (18.1)         | 68.0 (18.9)         |
|                    | PD                | 71.9 (3.2)          | 75.6 (3.6)         | 75.6 (2.9)          | 77.4          | 79.8         | 80.2          |               |              |               |                                                                                |                     |                     | 68.5 (19.4)        | 69.2 (17.8)         | 67.3 (16.0)         |
| SF                 | ICHD              | 77.5 (7.9)          | 75.6 (8.5)         | 76.3 (9.2)          | 59.3          | 51.5         | 49.1          |               |              |               |                                                                                |                     |                     | 70.3 (32.4)        | 68.5 (30.2)         | 60.9 (30.9)         |
|                    | PD                | 70.7(12.5)          | 71.2(13.1)         | 70.9(12.1)          | 53.8          | 56.5         | 70.8          |               |              |               |                                                                                |                     |                     | 74.2 (30.5)        | 74.8 (27.8)         | 75.0 (31.7)         |
| SL                 | ICHD              | 58.4 (1.9)          | 57.5 (1.9)         | 55.9 (1.9)          | 53.1          | 55.4         | 54.3          |               |              |               |                                                                                |                     |                     | 68.1 (19.7)        | 67.2 (20.1)         | 66.6 (17.5)         |
|                    | PD                | 56.6 (3.3)          | 49.4 (2.7)         | 53.7 (2.7)          | 53.8          | 58.6         | 60.3          |               |              |               |                                                                                |                     |                     | 69.0 (18.3)        | 69.4 (19.2)         | 67.3 (18.8)         |
| SS                 | ICHD              | 75.3 (2.3)          | 72.6 (2.5)         | 72.6 (2.4)          | 70.5          | 66.4         | 67.1          |               |              |               |                                                                                |                     |                     | 59.9 (24.6)        | 60.0 (22.7)         | 60.1 (21.8)         |

|           |             |               |               |               |      |      |      |  |  |  |  |  |  |                |                |                |
|-----------|-------------|---------------|---------------|---------------|------|------|------|--|--|--|--|--|--|----------------|----------------|----------------|
|           | <b>PD</b>   | 77.1<br>(5.2) | 69.4<br>(5.5) | 72.2<br>(5.0) | 66.2 | 69.8 | 66.7 |  |  |  |  |  |  | 63.6<br>(23.2) | 62.0<br>(22.7) | 58.3<br>(21.8) |
| <b>DE</b> | <b>ICHD</b> | 79.3<br>(2.2) | 84.6<br>(1.7) | 81.6<br>(2.0) |      |      |      |  |  |  |  |  |  | 85.4<br>(18.5) | 84.1<br>(19.3) | 84.4<br>(16.3) |
|           | <b>PD</b>   | 89.6<br>(2.8) | 82.8<br>(3.7) | 87<br>(3.1)   |      |      |      |  |  |  |  |  |  | 88.4<br>(14.8) | 88.0<br>(14.5) | 88.6<br>(14.2) |
| <b>PS</b> | <b>ICHD</b> | 75.9<br>(2.2) | 76.5<br>(1.9) | 77.2<br>(1.9) |      |      |      |  |  |  |  |  |  | 68.4<br>(23.2) | 67.8<br>(22.4) | 65.2<br>(23.6) |
|           | <b>PD</b>   | 83.3<br>(2.7) | 79.8<br>(3.2) | 77.1<br>(3.7) |      |      |      |  |  |  |  |  |  | 68.8<br>(22.1) | 71.1<br>(19.3) | 66.8<br>(20.7) |

CI = confidence intervals; ICHD = in-centre hemodialysis; mo = months; PD = peritoneal dialysis; SE = standard error; vs = versus; \*Harris mean differences adjusted for study cohort, time on dialysis, age, sex, social class, and comorbidity; Data is presented as it was reported in the published studies (some studies did not report SDs or SEs, and only presented means). Empty cells indicate data not reported in the published studies. **KDQOL domains** SP = symptoms/problems EK = effects of kidney disease BK = burden of kidney disease WS = work status CF = cognitive function QS = quality of social function SF = sexual function SL = sleep SS = social support DE = dialysis staff encouragement PS = patient satisfaction



Table 5: Quality of life scores categorized as the proportion of patients reporting the same, better or worse presented for the change in quality of life scores comparing in-centre hemodialysis to peritoneal dialysis (KDQOL)

| <b>First author, year</b>         |                          | <b>De Abreu, 2011*</b>                                   |                   |                  |
|-----------------------------------|--------------------------|----------------------------------------------------------|-------------------|------------------|
|                                   |                          | <b>Change in domain score from baseline to 12 months</b> |                   |                  |
| <b>Domain</b>                     | <b>Dialysis modality</b> | <b>Same (%)</b>                                          | <b>Better (%)</b> | <b>Worse (%)</b> |
| SP (symptoms/problems)            | ICHD                     | 30.9                                                     | 31.4              | 37.8             |
|                                   | PD                       | 29.8                                                     | 30.4              | 39.8             |
| EK (effects of kidney disease)    | ICHD                     | 29.3                                                     | 27.1              | 43.6             |
|                                   | PD                       | 26.1                                                     | 23.6              | 50.3             |
| BK (burden of kidney disease)     | ICHD                     | 20.2                                                     | 27.7              | 52.1             |
|                                   | PD                       | 26.9                                                     | 23.1              | 50               |
| WS (work status)                  | ICHD                     | 61.4                                                     | 18                | 20.6             |
|                                   | PD                       | 58.1                                                     | 16.3              | 25.6             |
| CF (cognitive function)           | ICHD                     | 14.9                                                     | 30.9              | 54.3             |
|                                   | PD                       | 24.2                                                     | 36.7              | 39.1             |
| QS (quality of social function)   | ICHD                     | 18.8                                                     | 33.3              | 47.9             |
|                                   | PD                       | 16.3                                                     | 33.1              | 50.6             |
| SF (sexual function)              | ICHD                     | 53.5                                                     | 6.9               | 39.7             |
|                                   | PD                       | 56.3                                                     | 0                 | 43.8             |
| SL (sleep)                        | ICHD                     | 15                                                       | 39.6              | 45.5             |
|                                   | PD                       | 20.5                                                     | 28.6              | 50.9             |
| SS (social support)               | ICHD                     | 56.6                                                     | 24.3              | 19.1             |
|                                   | PD                       | 65.6                                                     | 13.8              | 20.6             |
| DE (dialysis staff encouragement) | ICHD                     | 59.6                                                     | 21.3              | 19.2             |
|                                   | PD                       | 73.9                                                     | 13                | 13               |
| PS (patient satisfaction)         | ICHD                     | 43.9                                                     | 27.5              | 28.6             |
|                                   | PD                       | 45.3                                                     | 22.4              | 32.3             |

ICHD = in-centre hemodialysis; PD = peritoneal dialysis \*Clinically significant changes in quality of life for the individual domains were defined as a difference of +5 points.

Table 6: Mean quality of life scores for the change in quality of life scores comparing in-centre hemodialysis to peritoneal dialysis (EuroQOL)

| First author, year                         |                   | Manns, 2003            |                        |                         |
|--------------------------------------------|-------------------|------------------------|------------------------|-------------------------|
|                                            |                   | <b>Domain scores</b>   |                        |                         |
| Domain                                     | Dialysis modality | Baseline mean<br>(±SE) | 6 months<br>mean (±SE) | 12 months<br>mean (±SE) |
| <b>Visual analogue scale (VAS) (0-100)</b> | ICHD              | 61.9 (1.8)             | 59.3 (1.8)             | 59.5 (1.9)              |
|                                            | PD                | 63.3 (3.6)             | 64.3 (3.3)             | 65.5 (3.0)              |
| <b>Index score (IND) (0-1)</b>             | ICHD              | 0.65 (0.027)           | 0.62 (0.031)           | 0.62 (0.30)             |
|                                            | PD                | 0.68 (0.063)           | 0.68 (0.070)           | 0.67 (0.046)            |

ICHD = in-centre hemodialysis; PD = peritoneal dialysis; SE = standard error

Table 7: Mean quality of life scores for the change in quality of life scores comparing in-centre hemodialysis to peritoneal dialysis (CHOICE health experience questionnaire)

| <b>First author, year</b>      | <b>Wu, 2004</b>          |                      |                      |                                                          |                   |                  |
|--------------------------------|--------------------------|----------------------|----------------------|----------------------------------------------------------|-------------------|------------------|
| <b>Domains</b>                 | <b>Dialysis modality</b> | <b>Domain Scores</b> |                      | <b>Change in domain score from baseline to 12 months</b> |                   |                  |
|                                |                          | <b>Baseline mean</b> | <b>12-month mean</b> | <b>Same (%)</b>                                          | <b>Better (%)</b> | <b>Worse (%)</b> |
| <b>SP (symptoms/problems)</b>  | <b>ICHD</b>              | 77.3                 | 76.3                 | 56                                                       | 19                | 25               |
|                                | <b>PD</b>                | 79.3                 | 78.1                 | 59                                                       | 18                | 23               |
| <b>CF (cognitive function)</b> | <b>ICHD</b>              | 76.2                 | 74.3                 | 56                                                       | 17                | 27               |
|                                | <b>PD</b>                | 77.5                 | 75.8                 | 56                                                       | 19                | 25               |
| <b>SL (sleep)</b>              | <b>ICHD</b>              | 56.6                 | 58.4                 | 57                                                       | 20                | 23               |
|                                | <b>PD</b>                | 62.5                 | 56.9                 | 56                                                       | 17                | 27               |
| <b>SX (sex)</b>                | <b>ICHD</b>              | 68.4                 | 66.8                 | 50                                                       | 20                | 30               |
|                                | <b>PD</b>                | 62.5                 | 58                   | 50                                                       | 20                | 30               |
| <b>BI (body image)</b>         | <b>ICHD</b>              | 78.9                 | 82.4                 | 64                                                       | 17                | 19               |
|                                | <b>PD</b>                | 79.8                 | 79.7                 | 69                                                       | 13                | 18               |
| <b>QOL (quality of life)</b>   | <b>ICHD</b>              | 52.5                 | 52.6                 | 57                                                       | 19                | 24               |
|                                | <b>PD</b>                | 56.6                 | 53.1                 | 58                                                       | 17                | 25               |
| <b>FR (freedom)</b>            | <b>ICHD</b>              | 57.9                 | 58.5                 | 59                                                       | 19                | 22               |
|                                | <b>PD</b>                | 60.1                 | 61.7                 | 59                                                       | 21                | 20               |
| <b>TR (travel)</b>             | <b>ICHD</b>              | 58.1                 | 54.3                 | 58                                                       | 17                | 25               |
|                                | <b>PD</b>                | 66.6                 | 63                   | 60                                                       | 17                | 23               |
| <b>RC (recreation)</b>         | <b>ICHD</b>              | 58.9                 | 58.8                 | 60                                                       | 18                | 22               |
|                                | <b>PD</b>                | 64.9                 | 61.4                 | 65                                                       | 14                | 21               |
| <b>FN (finance)</b>            | <b>ICHD</b>              | 53.1                 | 52.7                 | 61                                                       | 17                | 23               |
|                                | <b>PD</b>                | 58.3                 | 64.5                 | 63                                                       | 19                | 18               |
| <b>WK (work)</b>               | <b>ICHD</b>              | 62                   | 61                   | 58                                                       | 18                | 24               |
|                                | <b>PD</b>                | 63.9                 | 67.8                 | 58                                                       | 23                | 19               |
| <b>DT (diet)</b>               | <b>ICHD</b>              | 58.7                 | 57.2                 | 58                                                       | 17                | 25               |
|                                | <b>PD</b>                | 72.3                 | 72.9                 | 62                                                       | 17                | 21               |
| <b>TM (time)</b>               | <b>ICHD</b>              | 57.3                 | 55                   | 63                                                       | 16                | 21               |
|                                | <b>PD</b>                | 58.7                 | 59.8                 | 67                                                       | 17                | 16               |

|             |             |      |      |    |    |    |
|-------------|-------------|------|------|----|----|----|
| AC (access) | <b>ICHD</b> | 66.6 | 72.3 | 53 | 24 | 23 |
|             | <b>PD</b>   | 74.9 | 80.7 | 58 | 23 | 19 |

ICHD = in-centre hemodialysis; PD = peritoneal dialysis

Table 8: Mean differences between peritoneal dialysis and in-centre hemodialysis (PD-ICHD) over time via mixed model analysis using multiple QOL scores

| Timepoint                    | Outcomes          |         |                    |         |                   |         |                       |         |                    |         |
|------------------------------|-------------------|---------|--------------------|---------|-------------------|---------|-----------------------|---------|--------------------|---------|
|                              | HADS              |         | IIRS               |         | Barthel score     |         | Symptoms score        |         | RTSQ               |         |
|                              | Estimate (95% CI) | p-value | Estimate (95% CI)  | p-value | Estimate (95% CI) | p-value | Estimate (95% CI)     | p-value | Estimate (95% CI)  | p-value |
| <b>3months vs 24 months</b>  | -                 | NS      | NS                 | NS      | -                 | -       | 4.12(-7.72 to -0.52)  | 0.03    | -                  | -       |
| <b>6months vs 24 months</b>  | -                 | NS      | NS                 | NS      | NS                | NS      | -3.51(-7.04 to 0.03)  | 0.05    | NS                 | NS      |
| <b>9 months vs 24 months</b> | -                 | NS      | NS                 | NS      | -                 | -       | -5.08(-8.56 to -1.59) | <0.01   | -                  | -       |
| <b>12months vs 24 months</b> | -                 | NS      | NS                 | NS      | NS                | NS      | NS                    | NS      | 3.96(0.37 to 7.54) | 0.03    |
| <b>15months vs 24 months</b> | -                 | NS      | NS                 | NS      | -                 | -       | NS                    | NS      | -                  | -       |
| <b>18months vs 24 months</b> | -                 | NS      | 4.42(0.03 to 8.80) | 0.05    | NS                | NS      | NS                    | NS      | NS                 | NS      |
| <b>21months vs 24 months</b> | -                 | NS      | NS                 | NS      | -                 | -       | NS                    | NS      | -                  | -       |

NS = Not significant; - means not included in the final model; Estimate is the average difference between PD - ICHD

**Quality of life scales:** HADS = Hospital Anxiety and Depression Scale; SF-12 = Short-form-12; IIRS = Illness Intrusiveness Rating Scale; RTSQ = Renal Treatment Satisfaction Questionnaire

Table 9: Mean quality of life scores for the change in quality of life scores comparing in-centre hemodialysis to home hemodialysis (Short-Form-36)

| First author, year                                                          |                   | Culleton, 2007 and Manns, 2009 |                                                             |
|-----------------------------------------------------------------------------|-------------------|--------------------------------|-------------------------------------------------------------|
|                                                                             |                   | Domain scores                  |                                                             |
| Domain                                                                      | Dialysis modality | Baseline: mean (95% CI)        | Difference of Nocturnal HHD-ICHD at 6 months: mean (95% CI) |
| MCS (mental health component score)                                         | ICHD              | 42.1 (37.2, 47.0)              | 0.71 (-5.85, 7.26)                                          |
|                                                                             | NHHD              | 50 (45.4, 54.5)                |                                                             |
| PCS (physical health component score)                                       | ICHD              | 32.7 (29.0, 36.5)              | 1.24 (-3.59, 6.07)                                          |
|                                                                             | NHHD              | 31.7 (26.1, 37.4)              |                                                             |
| PF (physical function - limitations in performing physical activities)      | ICHD              | 53.3 (43.7, 62.9)              | 1.35 (-9.98, 12.67)                                         |
|                                                                             | NHHD              | 49.6 (36.7, 62.6)              |                                                             |
| RP (role physical - limitations in role functioning due to physical health) | ICHD              | 21 (6.8, 35.2)                 | -3.88 (-24.15, 16.38)                                       |
|                                                                             | NHHD              | 29.8 (13.4, 46.2)              |                                                             |
| BP (bodily pain - somatic pain)                                             | ICHD              | 48.8 (37.7, 59.9)              | -1.03 (-14.77, 12.72)                                       |
|                                                                             | NHHD              | 59.9 (47.4, 72.3)              |                                                             |
| GH (general health - general perceptions about health)                      | ICHD              | 32 (23.3, 40.7)                | 12.82 (2.88, 22.77)                                         |
|                                                                             | NHHD              | 34.8 (24.8, 44.8)              |                                                             |
| V (vitality – energy/fatigue)                                               | ICHD              | 36.0 (27.9, 44.1)              | 2.82 (-8.67, 14.30)                                         |
|                                                                             | NHHD              | 40.6 (30.2, 51.0)              |                                                             |
| RE (role emotional – limitation in role functioning due to mental health)   | ICHD              | 41.3 (23.9, 58.8)              | -10.46 (-35.43, 14.50)                                      |
|                                                                             | NHHD              | 75.6 (60.6, 90.7)              |                                                             |
| SF (social functioning)                                                     | ICHD              | 54.5 (44.5, 64.5)              | 2.92 (-9.52, 15.37)                                         |
|                                                                             | NHHD              | 63.5 (50.6, 76.3)              |                                                             |
| MH (mental health – psychological well-being)                               | ICHD              | 63.4 (54.6, 72.1)              | 4.78 (-6.24, 15.81)                                         |
|                                                                             | NHHD              | 71.4 (62.7, 80.1)              |                                                             |

CI = confidence intervals; HHD = home hemodialysis; ICHD = in-centre hemodialysis; NHHD = nocturnal home hemodialysis; OR = odds ratio

Table 10: Mean quality of life scores for the change in quality of life scores comparing in-centre hemodialysis to home hemodialysis (Kidney Disease Quality of Life KDQOL)

| First author, year             |                   | Culleton, 2007 and Manns, 2009 |                                                                |
|--------------------------------|-------------------|--------------------------------|----------------------------------------------------------------|
|                                |                   | Domain scores                  |                                                                |
| Domain                         | Dialysis modality | Baseline:<br>mean (95% CI)     | Difference of Nocturnal HHD-ICHD at 6 months:<br>mean (95% CI) |
| SP (symptoms/problems)         | ICHD              | 65.4 (57.5, 73.4)              | -1.04 ( -8.31, 6.23)                                           |
|                                | NHHD              | 73.8 (67.6, 79.9)              |                                                                |
| EK (effects of kidney disease) | ICHD              | 42 (32.9, 51.1)                | 2.58 ( -4.54, 9.71)                                            |
|                                | NHHD              | 54.6 (45.9, 63.2)              |                                                                |
| BK (burden of kidney disease)  | ICHD              | 25.4 (17.1, 33.7)              | 10.70 (2.42, 18.99)                                            |
|                                | NHHD              | 35.3 (23.1, 47.6)              |                                                                |
| SL (sleep)                     | ICHD              | 46.3 (36.5, 56.1)              | -3.50 ( -12.66, 5.66)                                          |
|                                | NHHD              | 58.8 (53.2, 64.5)              |                                                                |

CI = confidence intervals; HHD = home hemodialysis; ICHD = in-centre hemodialysis; NHHD = nocturnal home hemodialysis

Table 11: Mean quality of life scores for the change in quality of life scores comparing conventional home hemodialysis to frequent nocturnal hemodialysis (RAND-36, Beck Depression Inventory, Study Sleep Problems Index)

| First author, year                                         |                   | Unruh, 2013 and Unruh, 2016 |                            |                                        |                                              |
|------------------------------------------------------------|-------------------|-----------------------------|----------------------------|----------------------------------------|----------------------------------------------|
|                                                            |                   | Domain scores               |                            | Calculated data                        |                                              |
| Domain                                                     | Dialysis modality | Baseline Mean ( $\pm$ SD)   | 12 months Mean ( $\pm$ SD) | Change from baseline Mean ( $\pm$ SE)* | Treatment comparison FNHHD vs CHHD (95% CI)* |
| <b>(RAND-36) Mental health composite</b>                   | <b>NHHD</b>       | 45.6 $\pm$ 10.5             | 48.2 $\pm$ 11.7            | +3.0 $\pm$ 1.6                         | 3.7 (-0.5, 8.3)                              |
|                                                            | <b>CHHD</b>       | 45.9 $\pm$ 12.6             | 45.6 $\pm$ 12.2            | -0.7 $\pm$ 1.6                         |                                              |
| <b>(RAND-36) Emotional well-being</b>                      | <b>NHHD</b>       | 75.7 $\pm$ 18.1             | 78.4 $\pm$ 18.0            | +3.3 $\pm$ 2.7                         | 5.3 (-1.8, 12.5)                             |
|                                                            | <b>CHHD</b>       | 77.1 $\pm$ 21.7             | 75.6 $\pm$ 21.4            | -2.0 $\pm$ 2.7                         |                                              |
| <b>(RAND-36) Role limitation due to emotional problems</b> | <b>NHHD</b>       | 87.4 $\pm$ 24.9             | 89.7 (26.7)                | +6.6 (5.4)                             | 4.9(-8.2, 18.2)                              |
|                                                            | <b>CHHD</b>       | 77.0 (39.3)                 | 82.9 (33.2)                | +1.7 (5.5)                             |                                              |
| <b>(RAND-36) Energy/fatigue</b>                            | <b>NHHD</b>       | 48.6 (22.9)                 | 51.4 (25.0)                | +3.1 (3.3)                             | 3.0 (-5.9, 11.9)                             |
|                                                            | <b>CHHD</b>       | 48.4 (19.5)                 | 49.6 (22.6)                | +0.1 (3.3)                             |                                              |
| <b>(RAND-36) Social functioning</b>                        | <b>NHHD</b>       | 73.1 (25.3)                 | 80.4 (26.1)                | +7.5 (3.9)                             | 7.2 (-3.1, 17.5)                             |
|                                                            | <b>CHHD</b>       | 75.6 (25.6)                 | 76.0 (26.2)                | +0.3 (3.9)                             |                                              |
| <b>SPI II (Sleep Problems Index)</b>                       | <b>NHHD</b>       | 33.8 (17.4)                 | 29.8 (17.7)                | -3.3 (2.8)                             | -4.5 (-12.2, 3.2)                            |
|                                                            | <b>CHHD</b>       | 32.0 (18.4)                 | 33.0 (23.1)                | +1.2 (2.8)                             |                                              |

|                                        |             |                |                |               |                    |
|----------------------------------------|-------------|----------------|----------------|---------------|--------------------|
| <b>Hours of sleep</b>                  | <b>NHHD</b> | 6.51<br>(1.43) | 6.80<br>(1.71) | + 0.27 (0.19) | 0.43 (-0.09, 0.96) |
|                                        | <b>CHHD</b> | 6.37<br>(1.45) | 6.24<br>(1.55) | -0.16 ( 0.19) |                    |
| <b>BDI (Beck Depression Inventory)</b> | <b>NHHD</b> | 11.2 (8.1)     | 9.7 (8.6)      | -2.0 (1.2)    | -1.6 (-4.9, 1.7)   |
|                                        | <b>CHHD</b> | 12.2 (9.2)     | 11.1<br>(10.2) | -0.4 (1.2)    |                    |
| <b>CG (cognitive subscale of BDI)</b>  | <b>NHHD</b> | 6.2 (6.1)      | 5.3 ( 5.9)     | -1.1 (0.9)    | -1.6 (-4.1, 0.8)   |
|                                        | <b>CHHD</b> | 6.5 (6.9)      | 6.6 (7.8)      | + 0.6 (0.9)   |                    |

CHHD = conventional home hemodialysis; NHHD = nocturnal home hemodialysis; SD = standard deviation; SE = standard error

\*Adjusted for clinical centre and baseline score
